# Supplementary material for: Combined diaphragm and lung ultrasound profiling in healthy full-term neonates: A study of early postnatal function
Source: Research Square preprint supplement (doi:10.21203/rs.3.rs-8512179/v1), 2026-01-29
Supplement: Supplementary file 1 [file cc01a6d8358afa10737c784d.docx]

**Supplementary Table 1.** Diaphragmatic function metrics on Days of Life (DOL) 1 and 3 according to sex.

| **Time point** | **Side** | **Metrics** | **Male**  **(N=10)** | **Female**  **(N=10)** | **P-value*** |
| --- | --- | --- | --- | --- | --- |
| DOL 1 | Right  hemi-diaphragm | DE (mm) | 4.19 [3.46, 4.59] | 3.97 [3.40, 5.38] | 0.821 |
| DCV (mm/sec) | 9.22[8.22, 12.46] | 10.66 [7.76, 12.76] | 0.940 |
| DTi (mm) | 1.80±0.35 | 1.79±0.34 | 0.949 |
| DTe(mm) | 2.37±0.56 | 2.31±0.37 | 0.785 |
| DTF (%) | 30.97±14.15 | 29.67±13.54 | 0.836 |
| Left  hemi-diaphragm | DE (mm) | 4.82 [3.46, 5.31] | 4.50 [3.65, 5.21] | 0.880 |
| DCV (mm/sec) | 11.62 [9.96, 12.17] | 10.78 [8.90, 17.87] | 0.880 |
| DTi (mm) | 1.70±0.41 | 1.63±0.58 | 0.290 |
| DTe(mm) | 2.16±0.53 | 2.09±0.61 | 0.325 |
| DTF (%) | 28.33±13.15 | 29.59±9.40 | 0.808 |
| ΔDTF (%) | | 2.64±13.48 | 0.08±19.05 | 0.733 |
| DOL 3 | Right  hemi-diaphragm | DE (mm) | 3.75 [3.51, 4.49] | 4.23 [4.03, 5.54] | 0.257 |
| DCV (mm/sec) | 10.04 [8.52, 14.18] | 10.95 [9.83, 15.18] | 0.405 |
| DTi (mm) | 1.85±0.34 | 1.75±0.46 | 0.584 |
| DTe(mm) | 2.39±0.36 | 2.30±0.58 | 0.687 |
| DTF (%) | 30.49±12.68 | 32.94±14.88 | 0.696 |
| Left  hemi-diaphragm | DE (mm) | 4.70 [3.80, 5.28] | 4.10 [3.41, 5.29] | 0.816 |
| DCV (mm/sec) | 12.78 [8.51, 15.66] | 12.39 [10.19, 19.85] | 0.571 |
| DTi (mm) | 1.67±0.47 | 1.52±0.52 | 0.212 |
| DTe(mm) | 2.2±0.61 | 2.03±0.66 | 0.290 |
| DTF (%) | 33.05±10.60 | 34.48±13.37 | 0.795 |
| ΔDTF (%) | | -2.56±15.52 | -1.53±12.85 | 0.874 |

*An independent samples t-test or Mann–Whitney U test was used depending on normality. Results are reported as mean ± standard deviation for normally distributed data, or as median and [Q1, Q3] for non-normally distributed data.

**Supplementary Table 2.** Ultrasound scores by lung field on Days of Life (DOL) 1 and 3, and overall. Data are expressed as counts for each score, with percentages in parentheses.

|  | **Score** | **R1** | **R2** | **R3** | **L1** | **L2** | **L3** |
| --- | --- | --- | --- | --- | --- | --- | --- |
| **Day 1** | **0** | 19 (95.0%) | 12 (60.0%) | 19 (95.0%) | 18 (90.0%) | 17 (85.0%) | 14 (70.0%) |
| **1** | 1 (5.0%) | 8 (40.0%) | 1 (5.0%) | 2 (10.0%) | 3 (15.0%) | 5 (25.0%) |
| **2** | 0 | 0 | 0 | 0 | 0 | 1 (5.0%) |
| **Day2** | **0** | 20 (100%) | 17 (85.0%) | 18 (90.0%) | 20 (100%) | 17 (85.0%) | 14 (70.0%) |
| **1** | 0 | 3 (15.0%) | 2 (10.0%) | 0 | 3 (15.0%) | 6 (30.0%) |
| **2** | 0 | 0 | 0 | 0 | 0 | 0 |
| **Total** | **0** | 39 (97.5%) | 29 (72.5%) | 37 (92.5%) | 38 (95%) | 34 (85%) | 28 (70%) |
| **1** | 1 (2.5%) | 11 (27.5%) | 3 (7.5%) | 2 (5%) | 6 (15%) | 11 (27.5%) |
| **2** | 0 | 0 | 0 | 0 | 0 | 1 (2.5%) |

**Supplementary Table 3**. Correlations of DE with DTF and absolute thickness change (DTe–DTi) at DOL 1 and DOL 3.

| **Time point** | **Side** | **DE vs DTF** | **DE vs (DTe– DΤi)** |
| --- | --- | --- | --- |
| DOL 1 | Right  hemi-diaphragm | rs=0.37, p=0.104 | rs= -0.41, p=0.073 |
|  | Left  hemi-diaphragm | rs=0.58, p=0.008 | rs=0.56, p=0.01 |
| DOL 3 | Right  hemi-diaphragm | rs= 0.26, p=0.261 | rs= -0.33, p=0.16 |
|  | Left  hemi-diaphragm | rs=0.49, p=0.027 | rs= 0.05, p=0.835 |

Spearman correlation coefficients (rs)
